# Supplementary material for: Combining two repurposed drugs as a promising approach for Alzheimer's disease therapy
Source: PubMed Central journal article supplement (PMC5378993; doi:10.1038/srep07608), 2015-01-08
Supplement: srep07608-s1.pdf [file srep07608-s1.pdf]

## Supplementary Information

# Combining two repurposed drugs as a promising approach for Alzheimer's disease therapy

Ilya Chumakov<sup>1</sup>, Serguei Nabirotkin<sup>1</sup>, Nathalie Cholet<sup>1</sup>, Aude Milet<sup>1</sup>, Aurélie Boucard<sup>1</sup>, Damien Toulorge<sup>1</sup>, Yannick Pereira<sup>1</sup>, Esther Graudens<sup>1</sup>, Sory Traoré<sup>1</sup>, Julie Fouquier<sup>1</sup>, Mickael Guedj<sup>1</sup>, Emmanuel Vial<sup>1</sup>, Noëlle Callizot<sup>2</sup>, Rémy Steinschneider<sup>3</sup>, Tangui Maurice<sup>4,5</sup>, Viviane Bertrand<sup>1</sup>, Catherine Scart-Grès<sup>1</sup>, Rodolphe Hajj<sup>1</sup> & Daniel Cohen<sup>1\*</sup>

<sup>1</sup>Pharnext, 11 rue des Peupliers, 92130 Issy-Les-Moulineaux, France.

<sup>2</sup>Neuro/Sys, 410 CD 60, 13120 Gardanne, France.

<sup>3</sup>Neuronexperts, 51 bd Pierre Dramard, 13916 Marseille, France.

<sup>4</sup>Université de Montpellier 2, 34095 Montpellier, France; Inserm, U710, 34095 Montpellier, France; EPHE, 75017 Paris, France.

<sup>5</sup>Amylgen, 2196 bd de la Lironde, 34980 Montferrier-sur-Lez, France.

\* Correspondence should be addressed to D.C ([dcohen@pharnext.com](mailto:dcohen@pharnext.com))

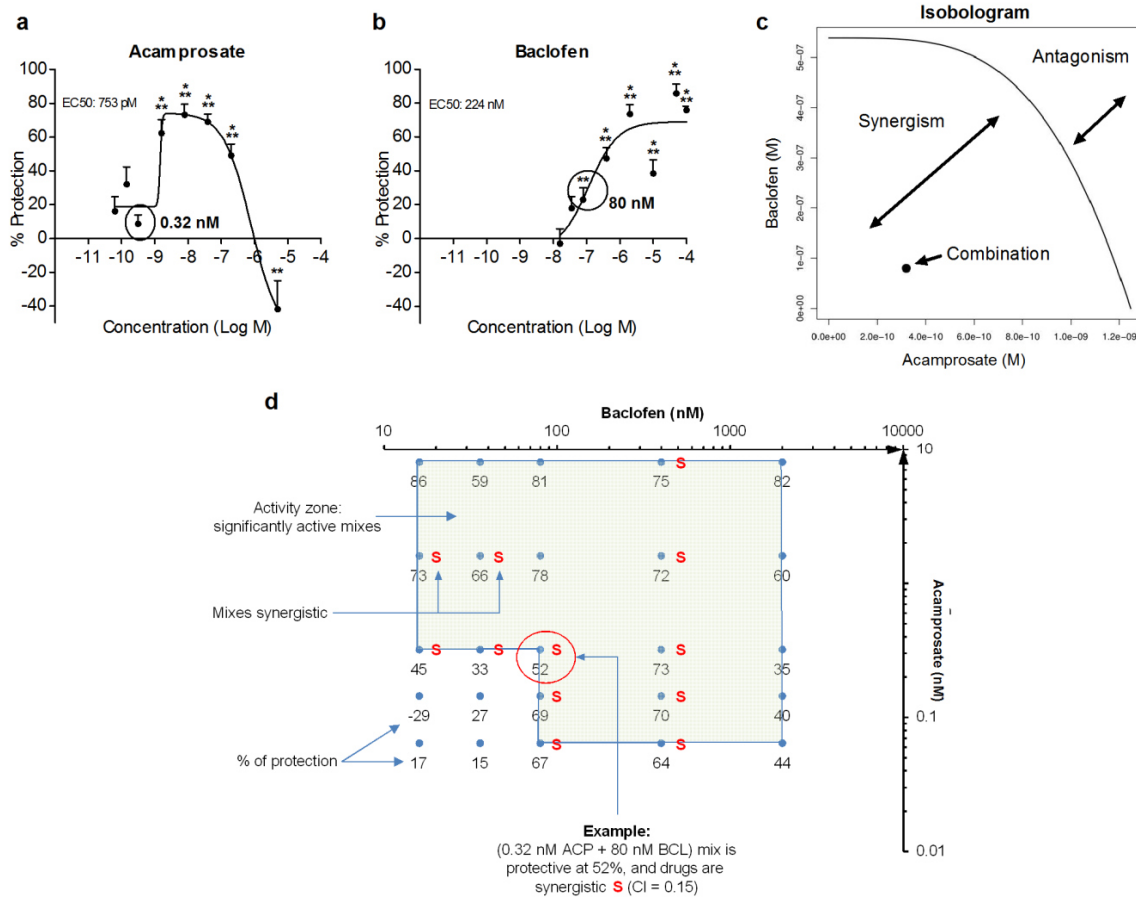

**Supplementary Figure 1 ACP and BCL combination is synergistic.** Example of synergism between ACP and BCL. Data are derived from a combined analysis of 7 different experiments with 18 replicates per experiment. Data were normalized to the non-treated control (100%) and  $A\beta_{1-42}$ -intoxicated cells (0%). **(a,b)** Dose-response of ACP and BCL respectively, assessed in the rat primary cortical neuronal model of neuroprotection. Sub-active doses of 0.32 nM of ACP and 80 nM of BCL (i.e. doses that are inactive in the cellular model or weakly active) were combined and used to treat  $A\beta$ -intoxicated neuronal cells. Panel **(c)** shows the isobologram of the combined drugs from **(a)** and **(b)**, with a Combination Index (CI) of 0.15 and a positive protective effect of 52%. The effect of this

synergistic combination was superior to the sum of the effects of its single drugs (see **Fig. 1c**). Values are mean  $\pm$  s.e.m.  $**P < 0.01$ ,  $***P < 0.001$  versus  $A\beta$ , ANOVA with Dunnett's test. **(d)** A dose effect study of ACP and BCL combination (ABC) was performed to check for synergism for a wide range of concentrations and drugs ratios. Several concentrations of ABC were active (activity zone), and several combinations of ACP and BCL were synergistic (**S** in red). Numbers under the dots represent the percentage of protection.

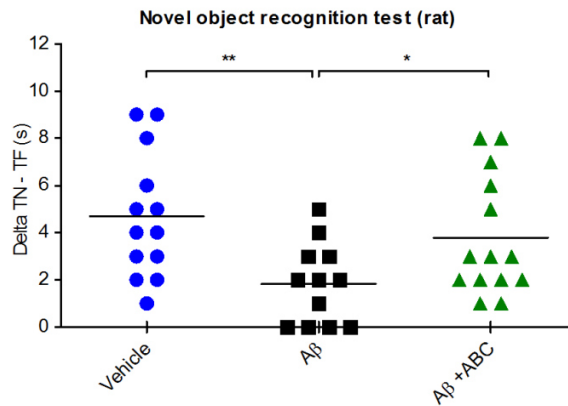

**Supplementary Figure 2 ABC is active in the novel object recognition (NOR) task performed in male Sprague Dawley rats.** 15 nmol of oligomeric A $\beta_{25-35}$  were injected intracerebroventricularly in each rat. Times spent in exploring the familiar (TF) and the novel (TN) objects were measured, and the delta TN-TF was computed for each animal. ABC positively alleviated cognitive deficit induced by A $\beta_{25-35}$  in rats. Values are mean  $\pm$  s.e.m. \* $P < 0.05$ , \*\* $P < 0.01$  versus A $\beta$ ;  $t$ -test ( $n = 12 - 14$  animals per group). ABC was composed of ACP 0.1 mg Kg $^{-1}$  and BCL 1.5 mg Kg $^{-1}$ , which is the rat equivalent dose of ACP 0.2 mg Kg $^{-1}$  and BCL 3 mg Kg $^{-1}$  in mice based on body surface.

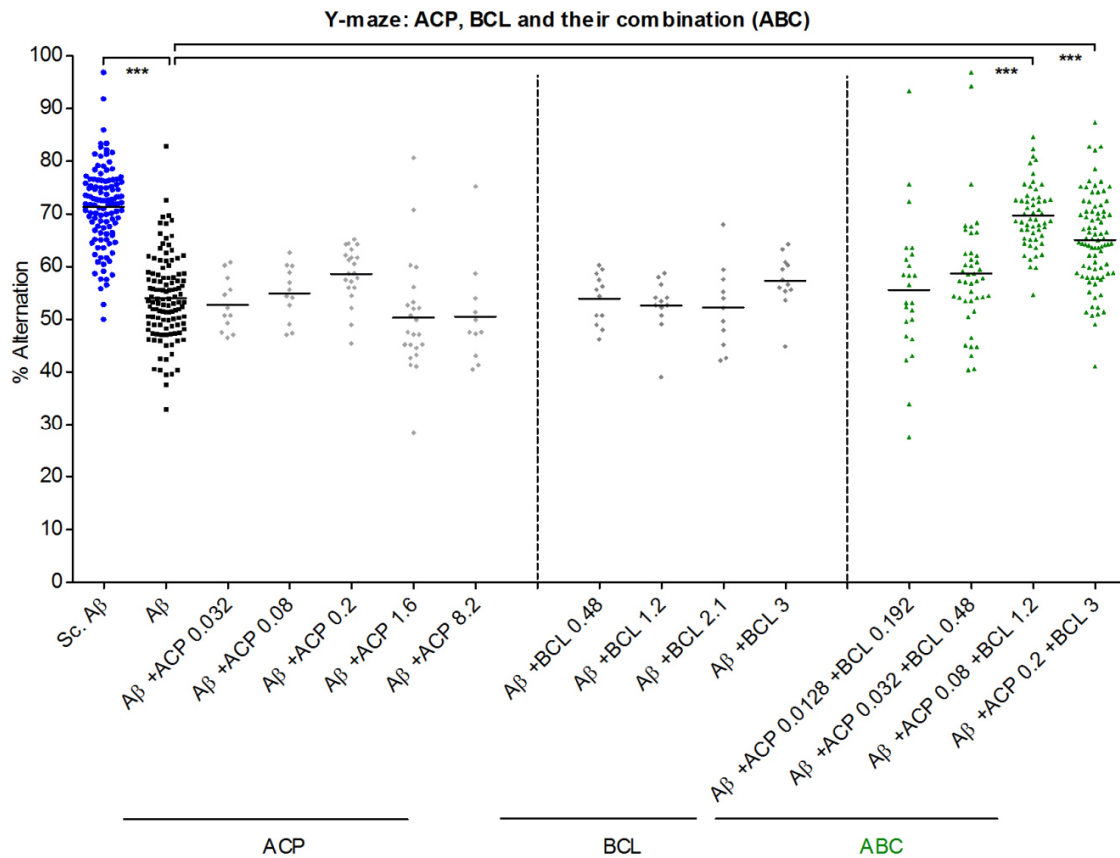

**Supplementary Figure 3 ABC synergistically rescues cognitive deficit in A $\beta$ <sub>25-35</sub> male Swiss mice in the Y-maze test.** Dose-response effect of ACP, BCL and their combination (ABC) in the spatial working memory Y-maze test performed in mice. For its ease of use, this test was used to screen ACP and BCL concentrations. Each mouse was injected intracerebroventricularly with 9 nmol of oligomeric A $\beta$ <sub>25-35</sub>. Data are derived from a combined analysis performed on 10 independent experiments in mice ( $n = 12$  per group per experiment), where each experiment was normalized to the global mean, over all the experiments, of the A $\beta$  group and the Sc.A $\beta$  group. It is to be noted that some doses such as ACP 0.2 mg Kg<sup>-1</sup> and BCL 3 mg Kg<sup>-1</sup> show an activity much weaker than their mix. \*\*\* $P < 0.001$  versus A $\beta$ ; ANOVA with Dunnett's test. Sc.: scrambled.

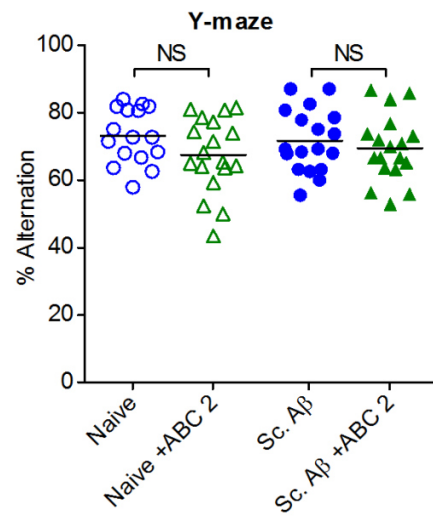

**Supplementary Figure 4 ABC does not affect cognition of control mice.** Normal naive, or intracerebroventricularly Sc.A $\beta_{25-35}$ -injected Swiss male mice were treated with ABC and assayed in the Y-maze test ( $n = 18$  per group). No significant difference was observed between controls and ABC-treated animals ( $t$ -test). ABC did not modify the cognition of treated mice in the absence of a pathological action of A $\beta_{25-35}$ . ABC 2 was composed of ACP 0.2 mg Kg $^{-1}$  + BCL 3 mg Kg $^{-1}$ . NS: not significant; Sc.: scrambled.

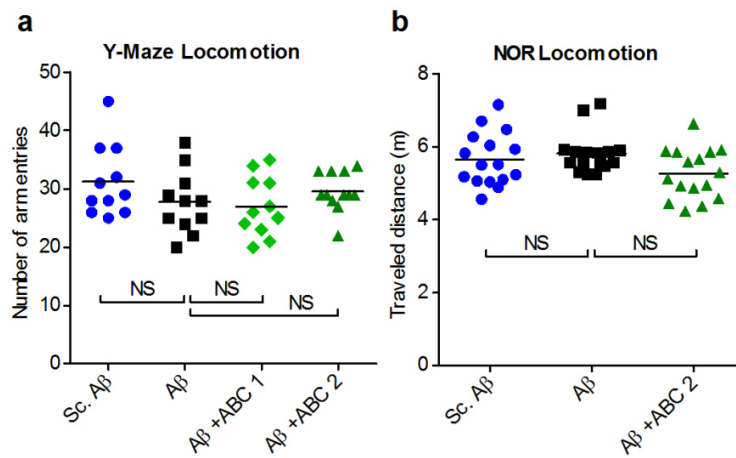

**Supplementary Figure 5 Locomotor activity of Swiss male mice is not significantly affected in the Y-maze and NOR tests.** (a) Mice behaved normally in the Y-maze test and did not exhibit any significant hyperactivity due to A $\beta$  injection or to ABC treatment, as assessed by the number of arm entries ( $n = 12$  animals per group). (b) Mice behaved normally in the NOR task and did not exhibit any significant hyperactivity due to A $\beta$  injection or to ABC treatment as assessed by the total distance travelled ( $n = 16$  animals per group). ANOVA with Dunnett's test. ABC 1: ACP 0.08 mg Kg<sup>-1</sup> + BCL 1.2 mg Kg<sup>-1</sup>; ABC 2: ACP 0.2 mg Kg<sup>-1</sup> + BCL 3 mg Kg<sup>-1</sup>. Sc.: scrambled.

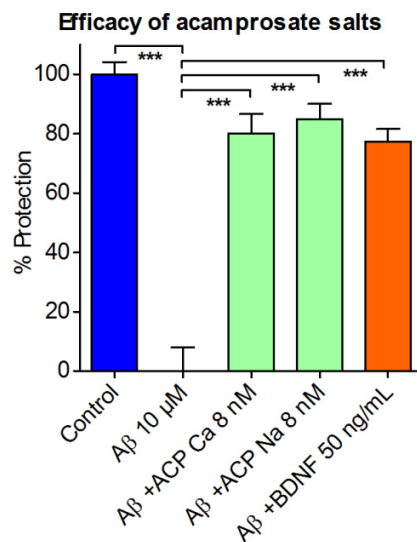

**Supplementary Figure 6 ACP is the active molecule in the ACP calcium formulation.**

Data were normalized to the non-treated control (100%) and A $\beta$ <sub>1-42</sub>-intoxicated cells (0%).

The panel describes ACP Ca and ACP Na neuroprotective effect in the rat primary cortical neuronal model. Protection was equivalent with both ACP forms highlighting the effect of ACP molecule and minimizing that of its salt. BDNF was used as positive control. Values are mean  $\pm$  s.e.m. \*\*\* $P < 0.001$  versus A $\beta$ ; ANOVA with Dunnett's test. ACP Ca: Calcium salt of acamprosate; ACP Na: Sodium salt of acamprosate.



**Supplementary Table 1 Characteristics of *in vitro* experiments.**

| Assay               | Days of culture | Seeding density (cells/well) | A $\beta$ <sub>1-42</sub> |                           |                                           | Measured endpoint                 |
|---------------------|-----------------|------------------------------|---------------------------|---------------------------|-------------------------------------------|-----------------------------------|
|                     |                 |                              | Concentration             | Beginning of intoxication | Intoxication time (h)                     |                                   |
| LDH <sup>†</sup>    | 12              | 30,000 <sup>‡</sup>          | 10 $\mu$ M                | D11                       | 24                                        | LDH release                       |
| MetO                | 11              | 15,000 <sup>‡</sup>          | 1.25 $\mu$ M              | D11                       | 4                                         | Number of stained neurons*        |
| Cyto c              | 11              | 30,000 <sup>‡</sup>          | 1.25 $\mu$ M              | D11                       | 4                                         | Number of stained neurons*        |
| Caspase 3           | 11              | 30,000 <sup>‡</sup>          | 10 $\mu$ M                | D11                       | 24                                        | Number of stained neurons*        |
| Tau phosphorylation | 12              | 30,000 <sup>‡</sup>          | 2.5 $\mu$ M               | D11                       | 16                                        | Number of stained neurons*        |
| PSD95/Synaptophysin | 22              | 20,000 <sup>¤</sup>          | 0.3 $\mu$ M               | D20                       | 48                                        | Surface overlap between markers   |
| Glutamate release   | 13              | 30,000 <sup>‡</sup>          | 2.5 $\mu$ M               | D12                       | 4                                         | L-glutamic acid                   |
| Capillary Network   | Passage 10      | 20,000 <sup>#</sup>          | 2.5 $\mu$ M               | 2 h                       | 18 (2 h after HBMEC seeding on Matrigel ) | Total length of capillary network |

<sup>‡</sup>Cortical neurons.

<sup>†</sup>Lactate dehydrogenase.

\*Staining overlapping with MAP2 staining.

<sup>¤</sup>Hippocampal neurons.

<sup>#</sup>HBMEC.

**Supplementary Table 2 Characteristics of *in vivo* experiments.**

| <b>Model</b>              | <b>Assay</b>                  | <b>Measured parameters</b>                     | <b>Start of ABC treatment (<i>b.i.d.</i>)*</b> | <b>Injections<sup>†</sup></b> | <b>Days of test</b> | <b>Total duration of treatment (Days)</b> |
|---------------------------|-------------------------------|------------------------------------------------|------------------------------------------------|-------------------------------|---------------------|-------------------------------------------|
| A $\beta_{25-35}$         | Morris Water Maze             | Acquisition (escape latency)                   | D-1                                            | A $\beta_{25-35}$ D0          | D7-D12              | 14                                        |
| A $\beta_{25-35}$         | Morris Water Maze             | Working memory (escape latency)                | D-1                                            | A $\beta_{25-35}$ D0          | D14-D16             | 18                                        |
| A $\beta_{25-35}$         | Novel Object Recognition mice | Exploration (% time of exploring novel object) | D-1                                            | A $\beta_{25-35}$ D0          | D6-D8               | 10                                        |
| A $\beta_{25-35}$         | Novel Object Recognition Rats | Explorations (time of exploring novel object)  | D-1                                            | A $\beta_{25-35}$ D0          | D15-D16             | 18                                        |
| A $\beta_{25-35}$         | Y-Maze                        | Alternations (%)                               | D-1                                            | A $\beta_{25-35}$ D0          | D7                  | 9                                         |
| A $\beta_{25-35}$         | Passive avoidance             | Retention (step through latency)               | D-1                                            | A $\beta_{25-35}$ D0          | D8-D9               | 11                                        |
| <i>hAPP</i> <sub>SL</sub> | Morris Water Maze             | Acquisition (escape latency)                   | Month 8 of age (D0)                            | NA <sup>‡</sup>               | D17-D20             | 20                                        |
| <i>hAPP</i> <sub>SL</sub> | Morris Water Maze             | Working memory (escape latency)                | Month 8 of age (D0)                            | NA                            | D22-D24             | 24                                        |

\**b.i.d.*: *bis in die*.

<sup>†</sup>Injected once. Mice were also treated with ABC *b.i.d.*

<sup>‡</sup>Not applicable.

**Supplementary Table 3 Antibodies used for *in vitro* endpoints.**

| <b>Antibodies</b>                                         | <b>Dilution</b> | <b>Distributor</b>        | <b>Catalogue reference / Clone</b> |
|-----------------------------------------------------------|-----------------|---------------------------|------------------------------------|
| <b><i>Primary Antibodies</i></b>                          |                 |                           |                                    |
| Mouse monoclonal Ab* to MAP2                              | 1/400           | Sigma Aldrich, France     | M4403 / HM-2                       |
| Rabbit polyclonal Ab to MetO                              | 1/100           | Euromedex, France         | MS01                               |
| Rabbit polyclonal Ab to Cyto c                            | 1/100           | Abcam, France             | ab90529                            |
| Rabbit polyclonal Ab to Caspase 3                         | 1/500           | Sigma, France             | C8487                              |
| Mouse monoclonal Ab to PSD95                              | 1/100           | Abcam, France             | ab2723                             |
| Rabbit polyclonal Ab to Synaptophysin                     | 1/100           | Abcam, France             | ab7837                             |
| Chicken polyclonal Ab to MAP2                             | 1/400           | Abcam, France             | ab5392                             |
| Mouse monoclonal Ab to PHF <sup>†</sup> -Tau, clone AT100 | 1/100           | Thermo Scientific, France | MN1060 / AT100                     |
| <b><i>Secondary Antibodies</i></b>                        |                 |                           |                                    |
| Alexa Fluor 488 goat Ab to mouse IgG                      |                 |                           | A11001                             |
| Alexa Fluor 568 goat Ab to rabbit IgG                     | 1/400           | Invitrogen, France        | A11011                             |
| Alexa Fluor 568 goat Ab to chicken IgG                    |                 |                           | A11041                             |

\*Antibody

<sup>†</sup>PHF: Pair Helical Filament.
